# Supplementary material for: An attempt to monitor seasonal dynamics of soil salinization in the Yellow River Delta region of China using Landsat data
Source: Copernicus journal article supplement (doi:10.5194/nhess-2018-303), 2018-10-30
Supplement: Supplementary file [file nhess-2018-303-RC2-supplement.pdf]

The authors used Landsat to monitor seasonal dynamics of soil salinization and compared three regression algorithms for salinity content inversion. Besides, the authors added SWIR to traditional vegetation index. Overall, there was a certain innovation of the manuscript; however, there were some questions and mistakes in this manuscript. Please check it and revise it strictly accordingly.

1. The title is better to revise to ‘Monitoring seasonal dynamics of soil salinization in the Yellow River Delta region of China using Landsat data’
2. Please revise the abstract, especially for the part of methods, from your abstract readers could not understand which regression models were used in the prediction model.
3. ‘The SSC best inversion model of spring was also determined as the optimal model of winter, similarly, the best model of autumn was also as the optimal model of summer’ this sentence was very confusing, please revise it.
4. I am a bit confused about your four seasons inversion. You monitor four seasons dynamics of soil salinization; why didn’t you build models for four seasons and just choose two season for models building. You may discuss the soil salinity content of spring was similar with that of winter, for example, while these two seasons vegetation was quite different. So why you applied the spring soil salinity model to that of winter. Please add this discussion.
5. In the part of ‘2.5 Inversion model construction and optimization’, the first six lines were too redundant, please simplify it.
6. Conclusions should be simplified.
7. There were some mistakes in the manuscript, eg, line 6 of abstract, the word should be constructed. Please read carefully and avoid these minor mistakes.
8. The language should be polished before publication.
